# Supplementary material
Source: HighWire-hosted journal article supplement (http://dmd.aspetjournals.org/highwire/filestream/79758/field_highwire_adjunct_files/5/1087_supp_table2.pdf)
Supplement: 1087_supp_table2.pdf [file 1087_supp_table2.pdf]

**Metabolic disposition of triazolam and clobazam in humanized CYP3A mice with a double knockout background of mouse *Cyp2c* and *Cyp3a* genes**

Kaoru Kobayashi, Genki Minegishi, Nina Kuriyama, Atsushi Miyajima, Satoshi Abe, Kanako Kazuki, Yasuhiro Kazuki

Drug Metabolism and Disposition

Manuscript Number: DMD-AR-2022-001087

Supplemental Table 2. Primer list for genomic PCR analysis.

| Gene or aim          | Primer name<br>(forward) | Forward primer (5'-3')       | Primer name<br>(reverse) | Reverse primer (5'-3')       | Product<br>size |
|----------------------|--------------------------|------------------------------|--------------------------|------------------------------|-----------------|
| Cyp2C KO<br>junction | Cyp2c55 J1L              | CACCAAAAGTCGATCTCTAGCCTCCACA | Cyp2c70 J1R              | GTTGAGCTAGGCCTTGAGGAAACTCCAA | 3 kbp           |
| Cyp2c55              | Cyp2c55 1L               | AGCAGAACACACTGGCTGTTGC       | Cyp2c55 1R               | GACAGAGGATGGATCTGCATGG       | 191 bp          |
| Cyp2c29              | Cyp2c29 1L               | TTTCTGGCCCCTGCTGTGAT         | Cyp2c29 1R               | TGTGTTTGCTGGGTCTTGAGAGA      | 128 bp          |
| Cyp2c39              | Cyp2c39 1L               | AGATCACATATTCTGACCCCCTCCT    | Cyp2c39 1R               | CAGAAACCAGATGTGTTTGCTAGGTC   | 150 bp          |
| Cyp2c54              | Cyp2c54 1L               | TCAAATGCCTGGCTCCACTG         | Cyp2c54 1R               | GGAATCAGGTCCATATCATCACAGC    | 192 bp          |
